# Supplementary material for: Genomic characterization of antimicrobial-resistance and virulence factors in Salmonella isolates obtained from pig farms in Antioquia, Colombia
Source: PubMed Central journal article supplement (PMC11801710; doi:10.1371/journal.pntd.0012830), 2025-01-31
Supplement: pntd.0012830.s002.pdf [file pntd.0012830.s002.pdf]

!"#\$%&

!

"#\$%&'()\*! \*#))(\* +\$, !-. (\$# /&\*! \*01)1\*2()&31+#\$! #4! 1\$+ /&\*)#5&167)(%&%21\$2! 1\$' 889! :&&\$ (! ; <! 2#!

-

!

3%#4/0)&

!

4"561,7# 11, #8' )7")\*74"15' ), 11"73/' 1"8' )7913), 7: . : ; <@-Q!2#216!#4!WX!@%#612(%!#4!?16 / #\$(661!%BB!

E()(!&\$\*6A' (' a9!:@\$(!TT[<D9
